# Supplementary material for: Self-Assembled Triphenylphosphonium-Conjugated Dicyanostilbene Nanoparticles and Their Fluorescence Probes for Reactive Oxygen Species
Source: MDPI journal article supplement (doi:10.3390/nano8121034), 2018-12-12
Supplement: s1 [file s1]

## Supplementary Materials

### Self-assembled triphenylphosphonium-conjugated dicyanostilbene nanoparticles and their fluorescence probes for reactive oxygen species

Wonjin Choi<sup>1,†</sup>, Na Young Lim<sup>1,†</sup>, Heekyoung Choi<sup>1</sup>, Moo Lyong Seo<sup>1,\*</sup>, Junho Ahn<sup>2,\*</sup>, Jong Hwa Jung<sup>1,\*</sup>

<sup>1</sup> Affiliation 1; Department of Chemistry and Research Institute of Natural Science, Gyeongsang National University, Jinju, 52828, Republic of Korea, cwj1685@gnu.ac.kr (W.C.); skdud325@gnu.ac.kr (N.Y.L.); smile377@gnu.ac.kr (H.C.); mlseo@gnu.ac.kr (M.L.S.).

<sup>2</sup> Affiliation 2; Composites Research Division, Korea Institute of Materials Science, 797 Changwondaero, Changwon, 51508, South Korea, junho2587@kims.re.kr (J.A.).

\* Correspondence: jonghwa@gnu.ac.kr; Tel.: +82-55-772-1488

† These authors contributed equally to this work.

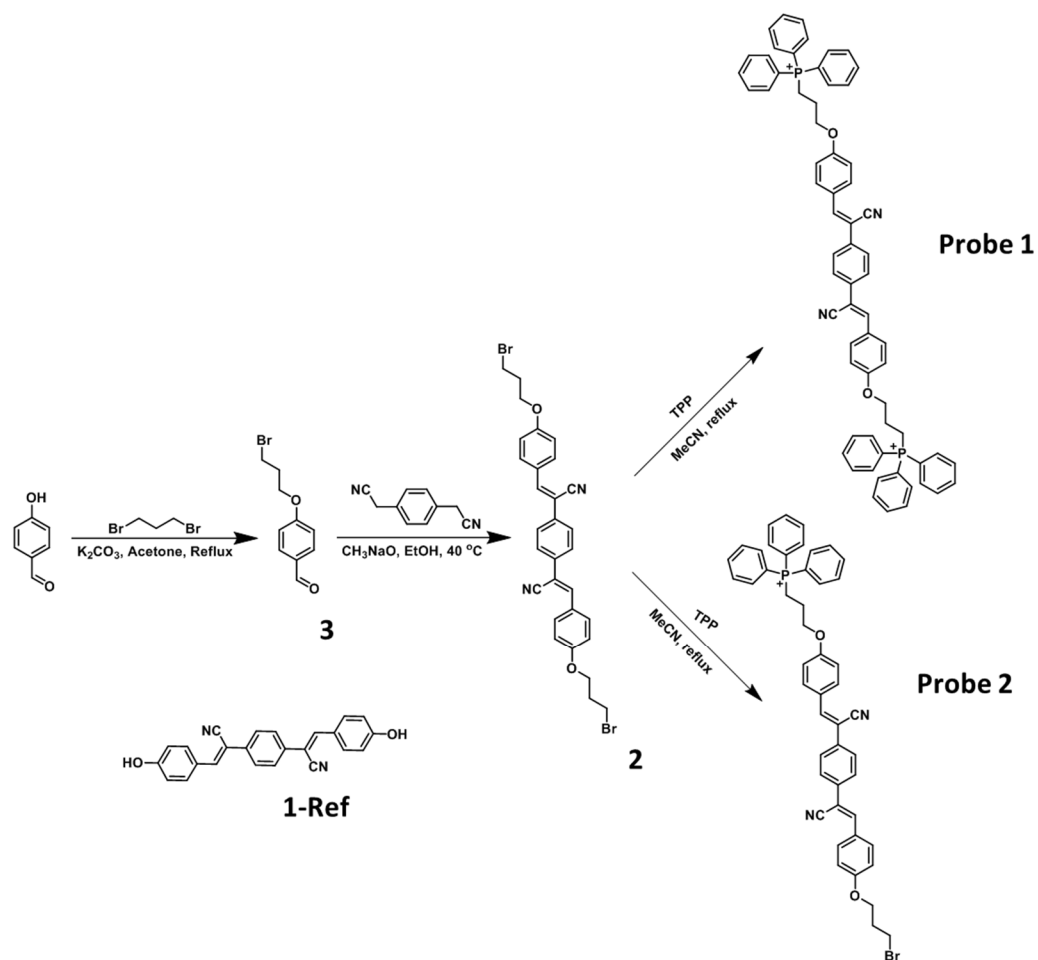

**Scheme S1.** Synthesis route of probes **1**, **2** and **1-Ref**.

(A)

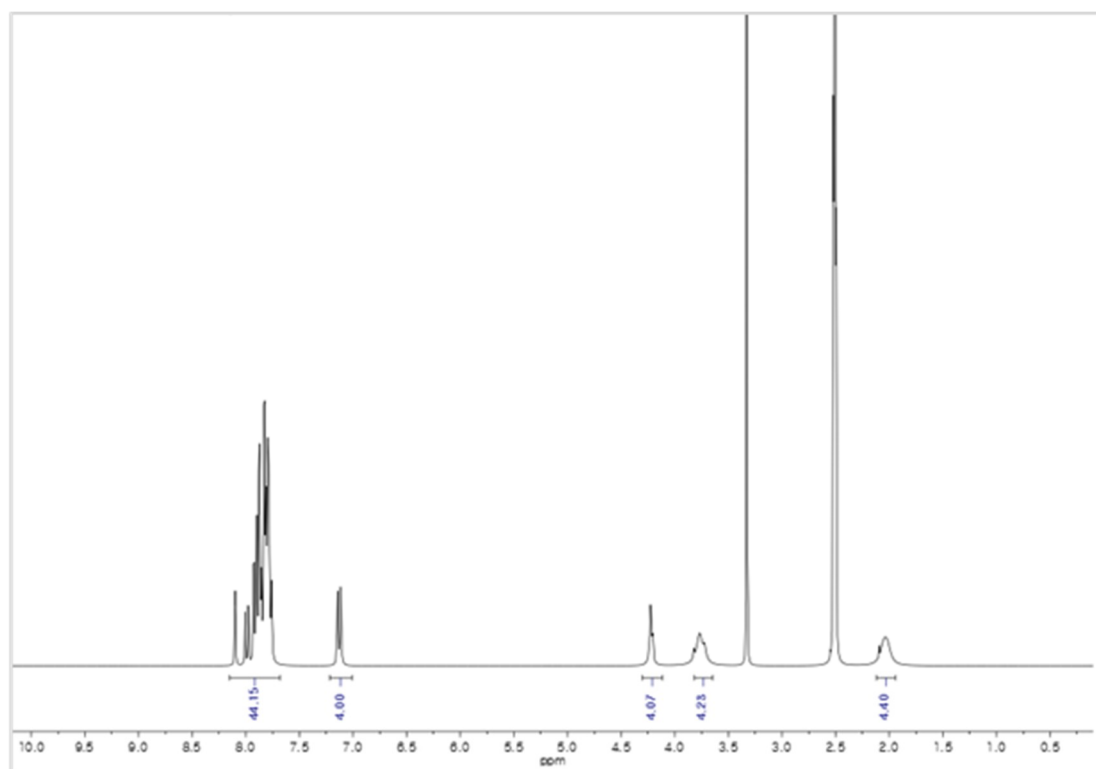

(B)

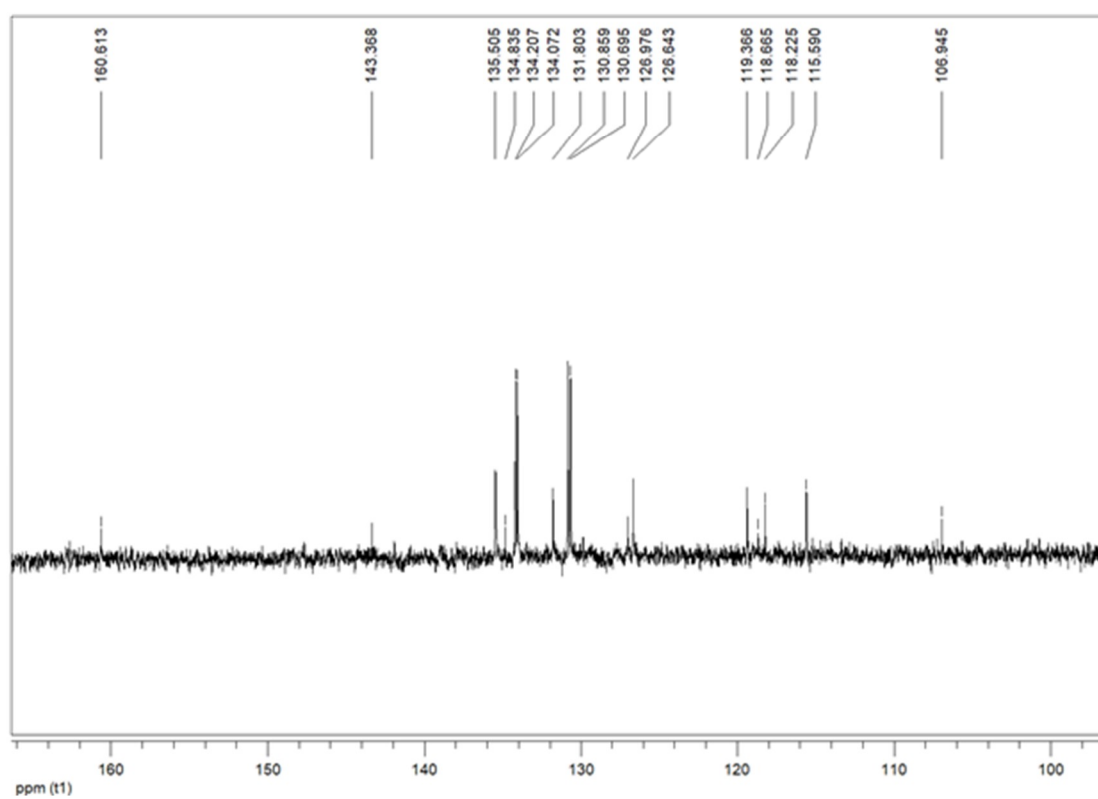

(C)

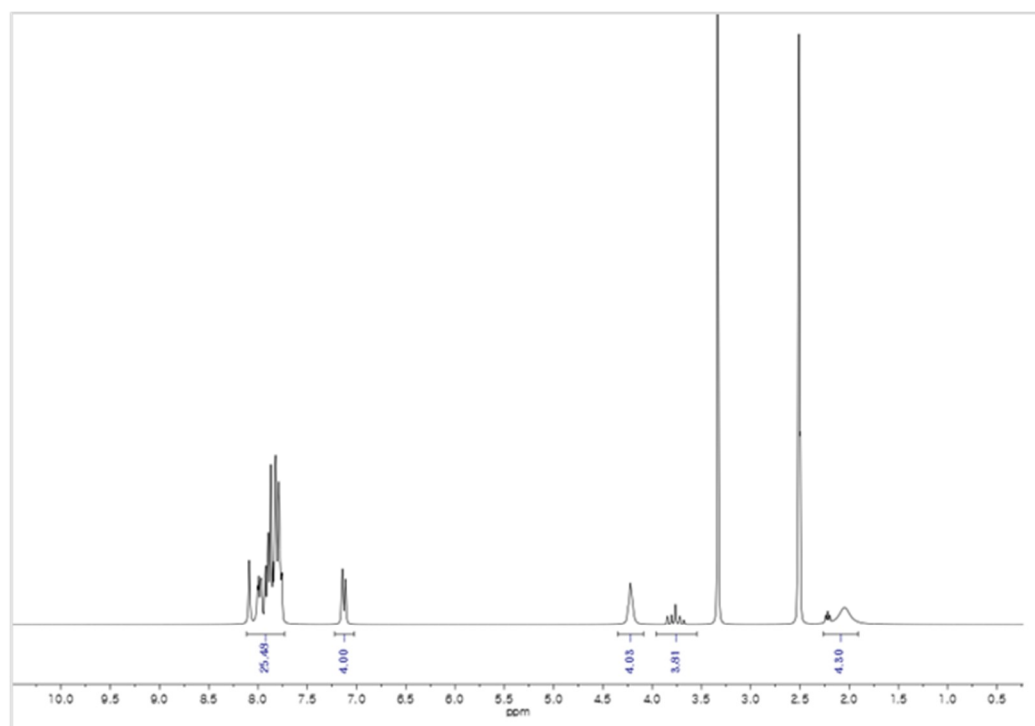

(D)

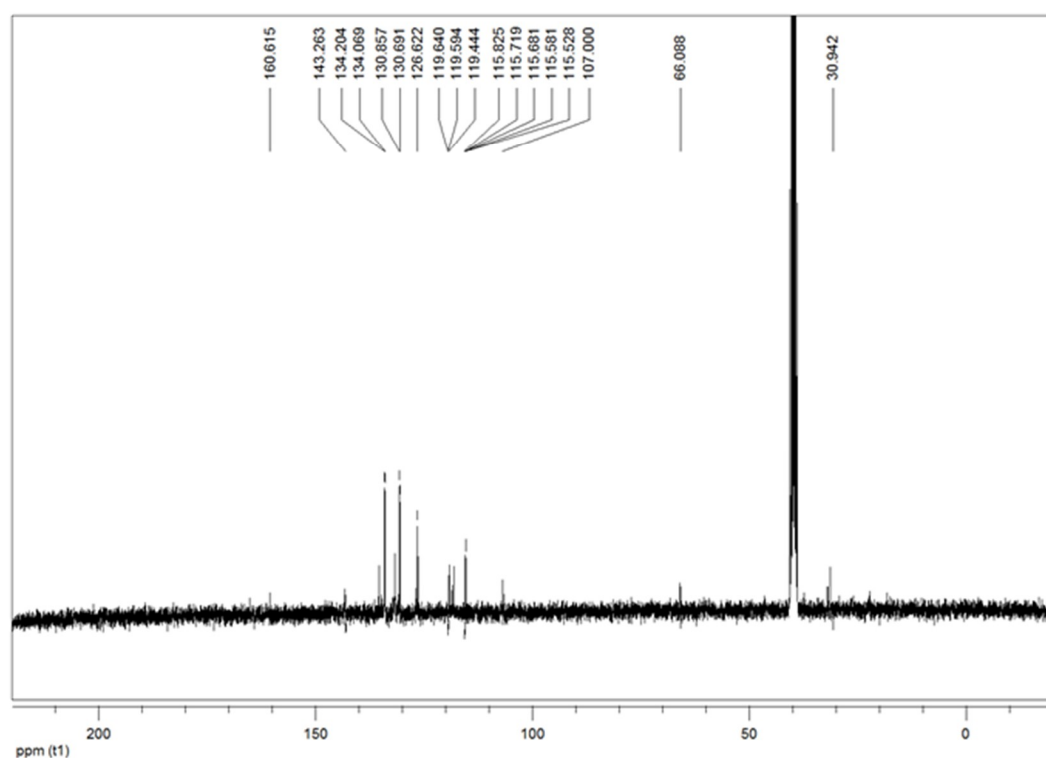

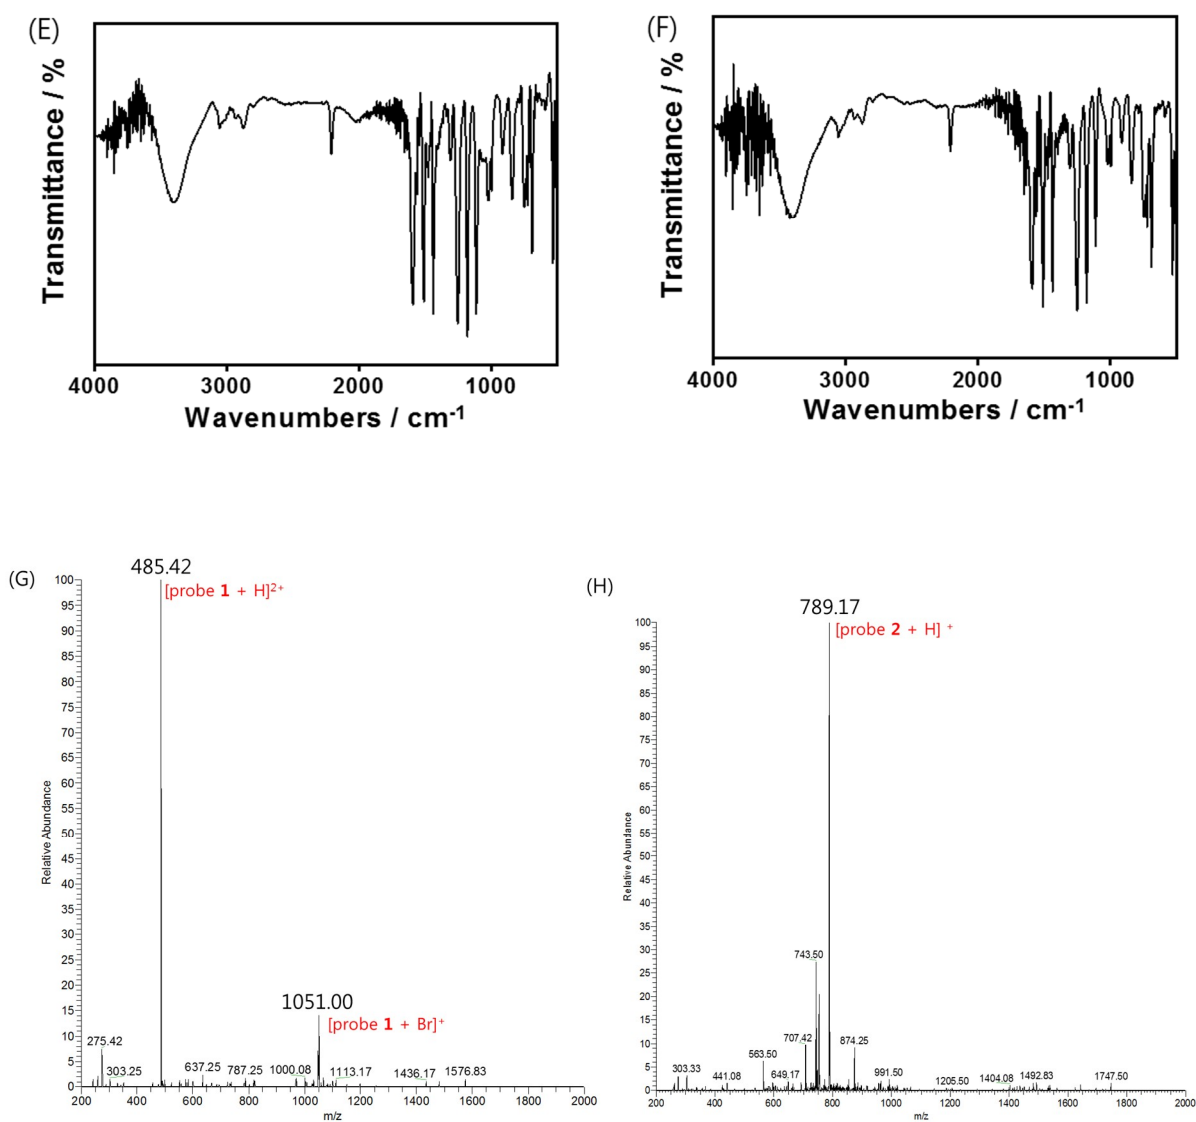

**Figure S1.**  $^1\text{H}$  NMR spectra of probes (A) **1** and (C) **2** in  $\text{DMSO}-d_6$ .  $^{13}\text{C}$  NMR spectra of probes (B) **1** and (D) **2** in  $\text{DMSO}-d_6$ . FT-IR spectra of probes (E) **1** and (F) **2**. ESI-MS spectra of probes (G) **1** and (H) **2**.

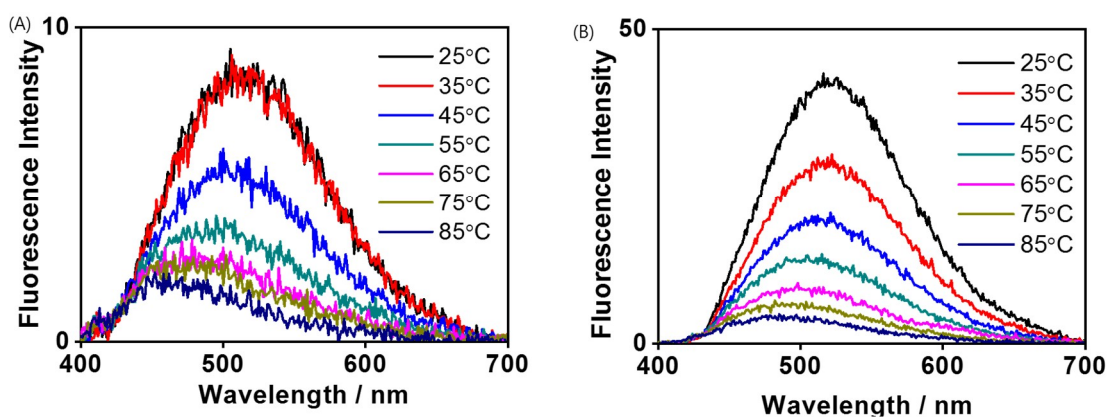

**Figure S2.** (A) Temperature dependent measurement of Fluorescence spectra of probe 1 (25  $\mu\text{M}$ ). (B) Temperature dependent measurement of Fluorescence spectra of probe 2 (6.25  $\mu\text{M}$ ).

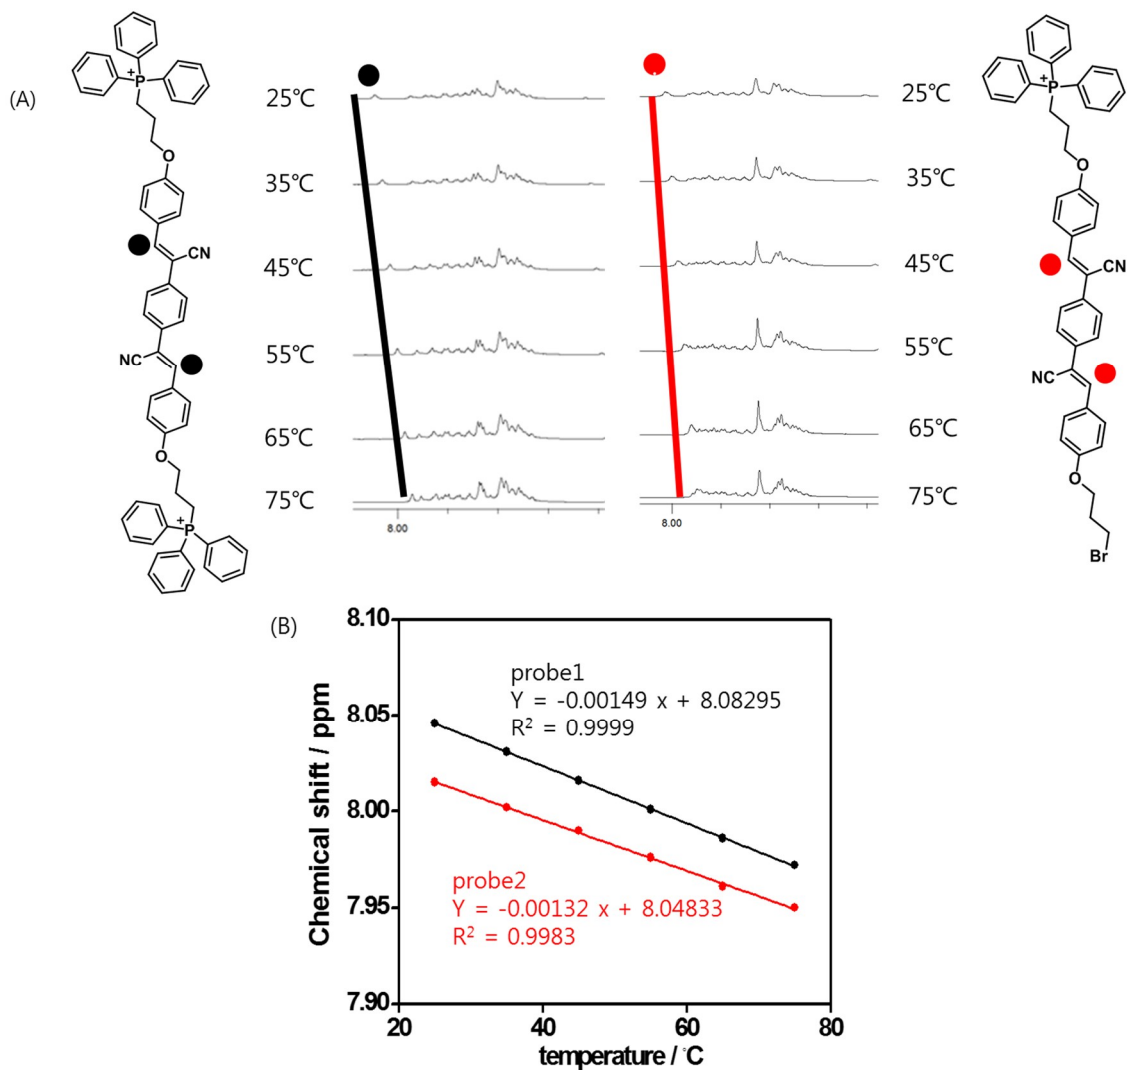

**Figure S3.** (A) Temperature dependent measurement of  $^1\text{H}$  NMR spectra of probes 1 and 2 in  $\text{DMSO-}d_6/\text{D}_2\text{O}$  (99:1 v/v%). (B) Linear equation of chemical shift according to temperature.

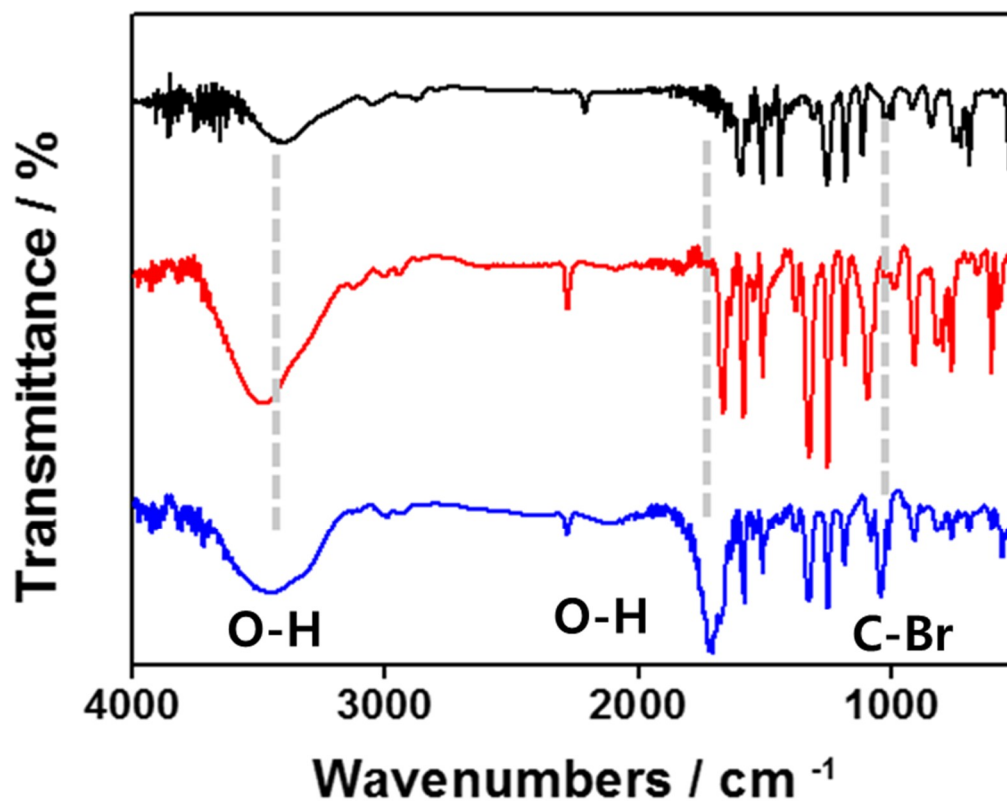

**Figure S4.** IR spectra of Probe **2** (100  $\mu\text{M}$ ) in DMSO/ $\text{H}_2\text{O}$ (1/99 v/v%). Black line is Probe **2**, Red line is Probe **2** in DMSO/ $\text{H}_2\text{O}$  (1/99 v/v%) solution, Blue line is Probe **2** with  $\text{ClO}^-$  (10 equiv.) in DMSO/ $\text{H}_2\text{O}$ (1/99 v/v%) solution.

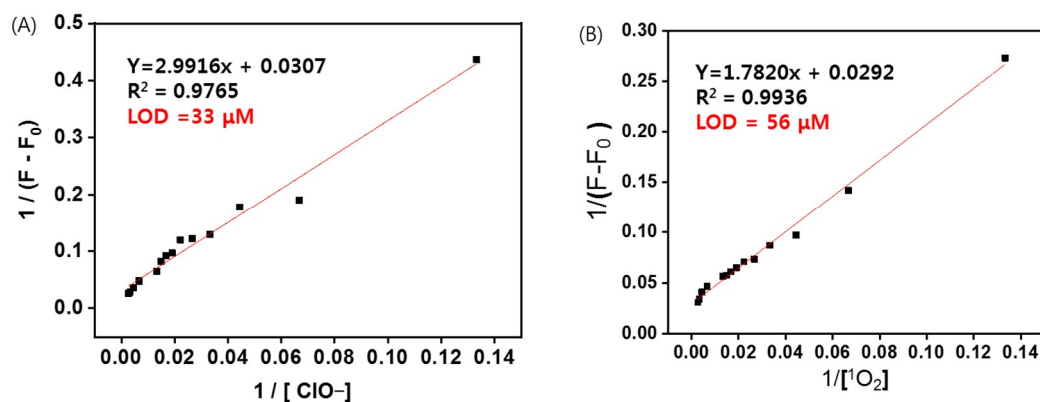

**Figure S5.** Fit linear equation of fluorescence intensity of probe **1** over (A)  $\text{ClO}^-$  and (B)  $^1\text{O}_2$  to obtain limit of detection.

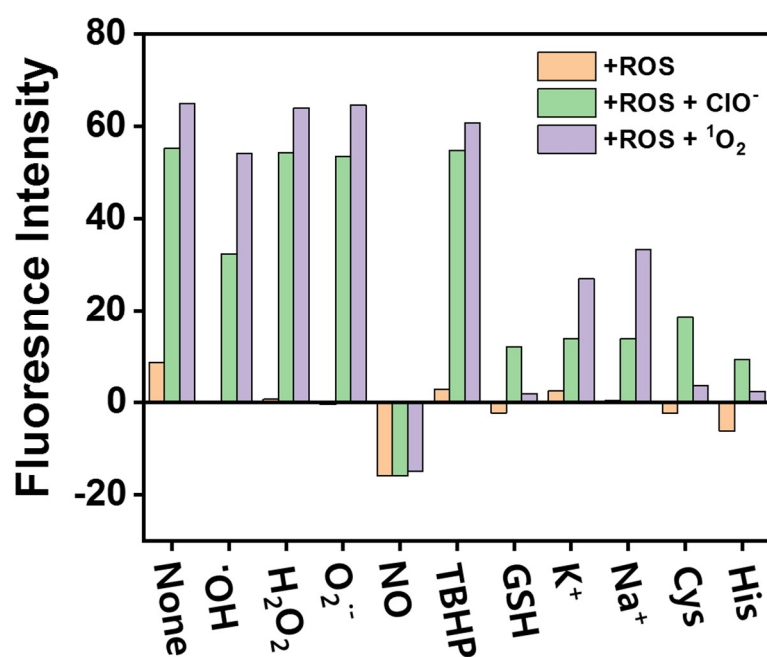

**Figure S6.** Competition-based fluorescence emission of probe **1** (25 μM) in the presence of various ROS (10 equiv.), Ions (10 equiv.) and Amino acids (10 equiv.) in DMSO/H<sub>2</sub>O(1/99 v/v%).



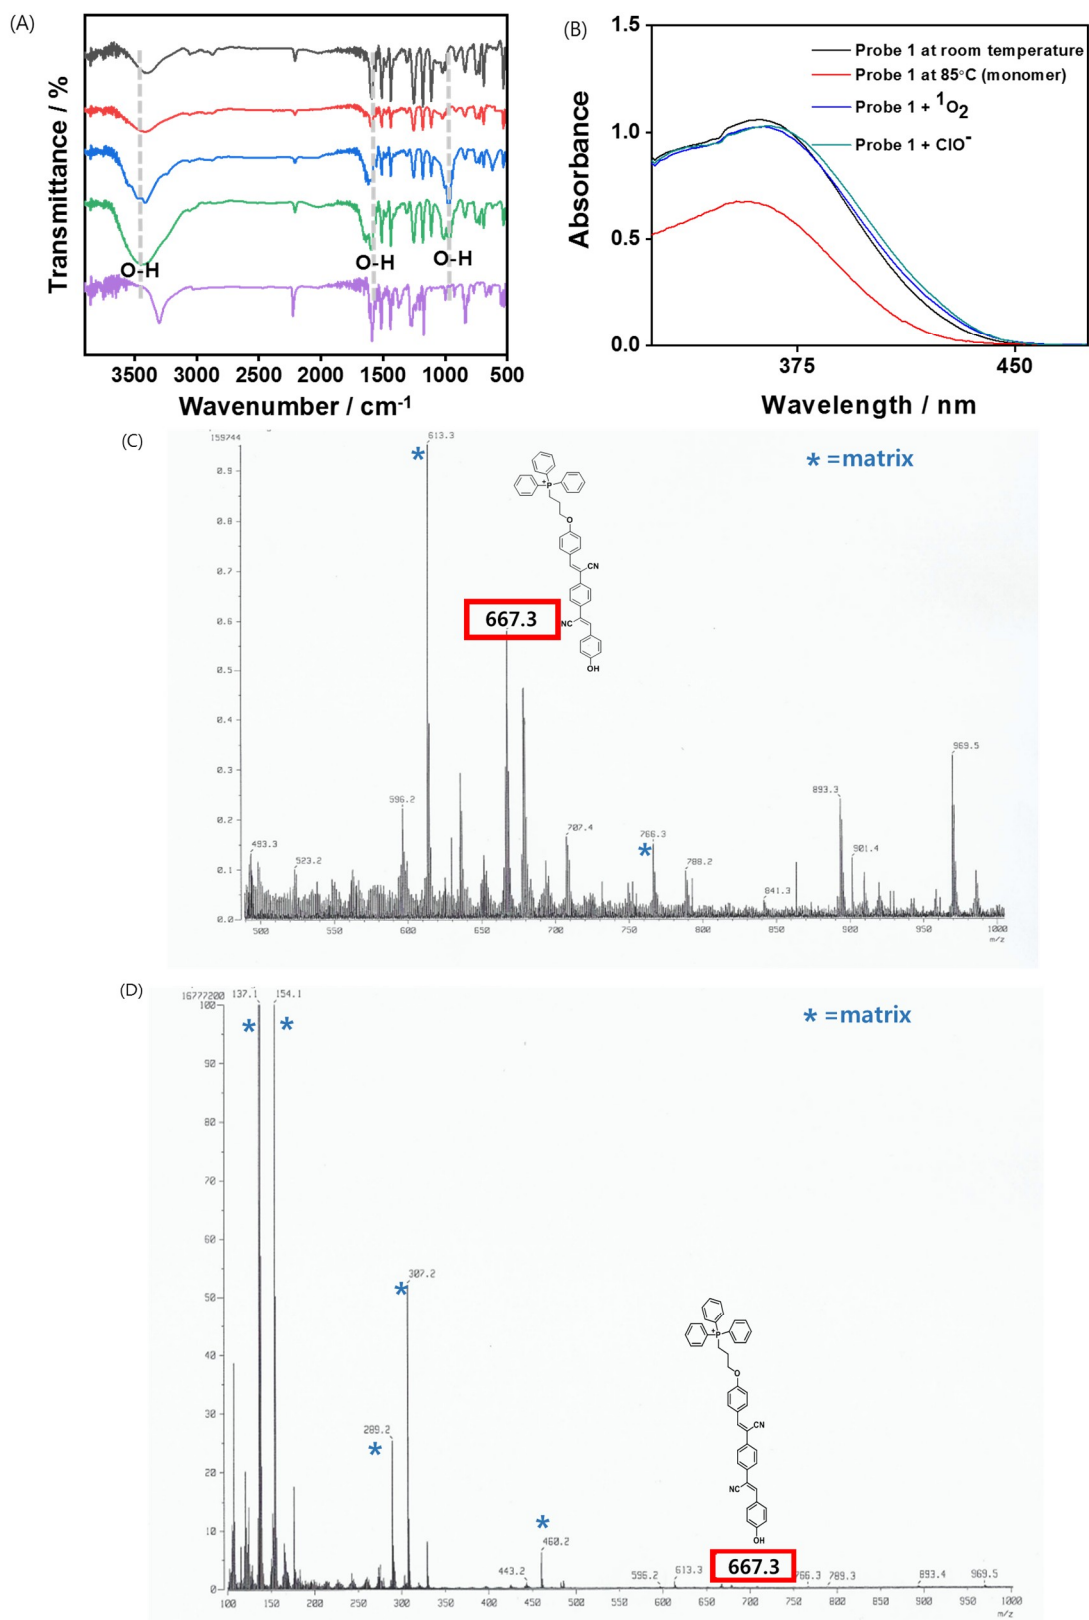

**Figure S7.** (A) IR spectra of **1** (100  $\mu\text{M}$ ) in DMSO/ $\text{H}_2\text{O}$  (1/99 v/v%). Black line is pristine probe **1**, Red line is freeze-dried self-assembled probe **1** from DMSO/ $\text{H}_2\text{O}$  (1/99 v/v%) solution, Blue line is self-assembled probe **1** with  $\text{ClO}^-$  in DMSO/ $\text{H}_2\text{O}$  (1/99 v/v%) solution, Green line is self-assembled probe **1** with  $^1\text{O}_2$  in DMSO/ $\text{H}_2\text{O}$  (1/99 v/v%) solution and Purple line is dicyanostilbene (**1-Ref**). (B) UV-Vis spectra of probe **1** (100  $\mu\text{M}$ ) in DMSO/ $\text{H}_2\text{O}$  (1/99 v/v%) containing its monomer, self-assembled state, with  $^1\text{O}_2$  or  $\text{ClO}^-$ . FAB-MASS spectra of probe **1** (1mM) after adding (C)  $\text{ClO}^-$  and (D)  $^1\text{O}_2$  at NBA matrix.

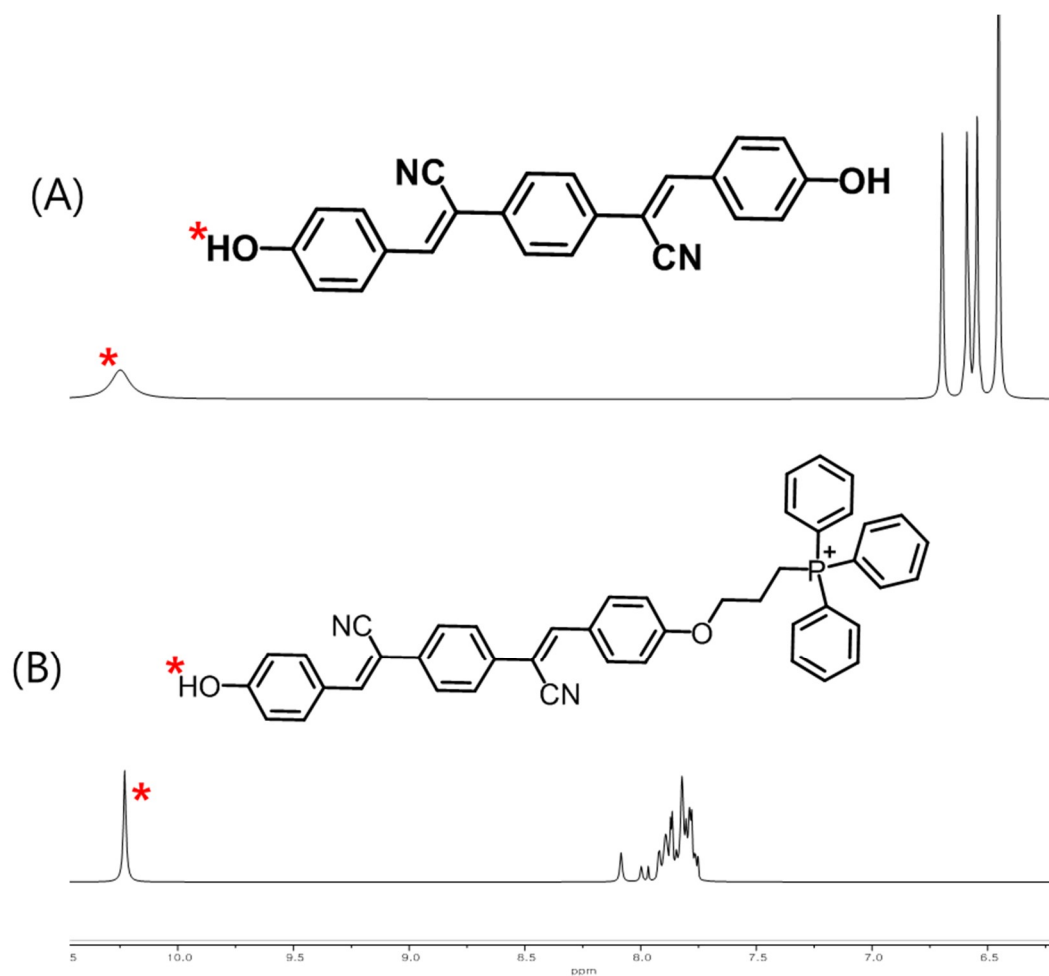

**Figure S8.**  $^1\text{H}$  NMR spectra of (A) dicyanosilbene involving  $-\text{OH}$  group (**1-Ref**) and (B) probe **1** after addition of  $^1\text{O}_2$ .

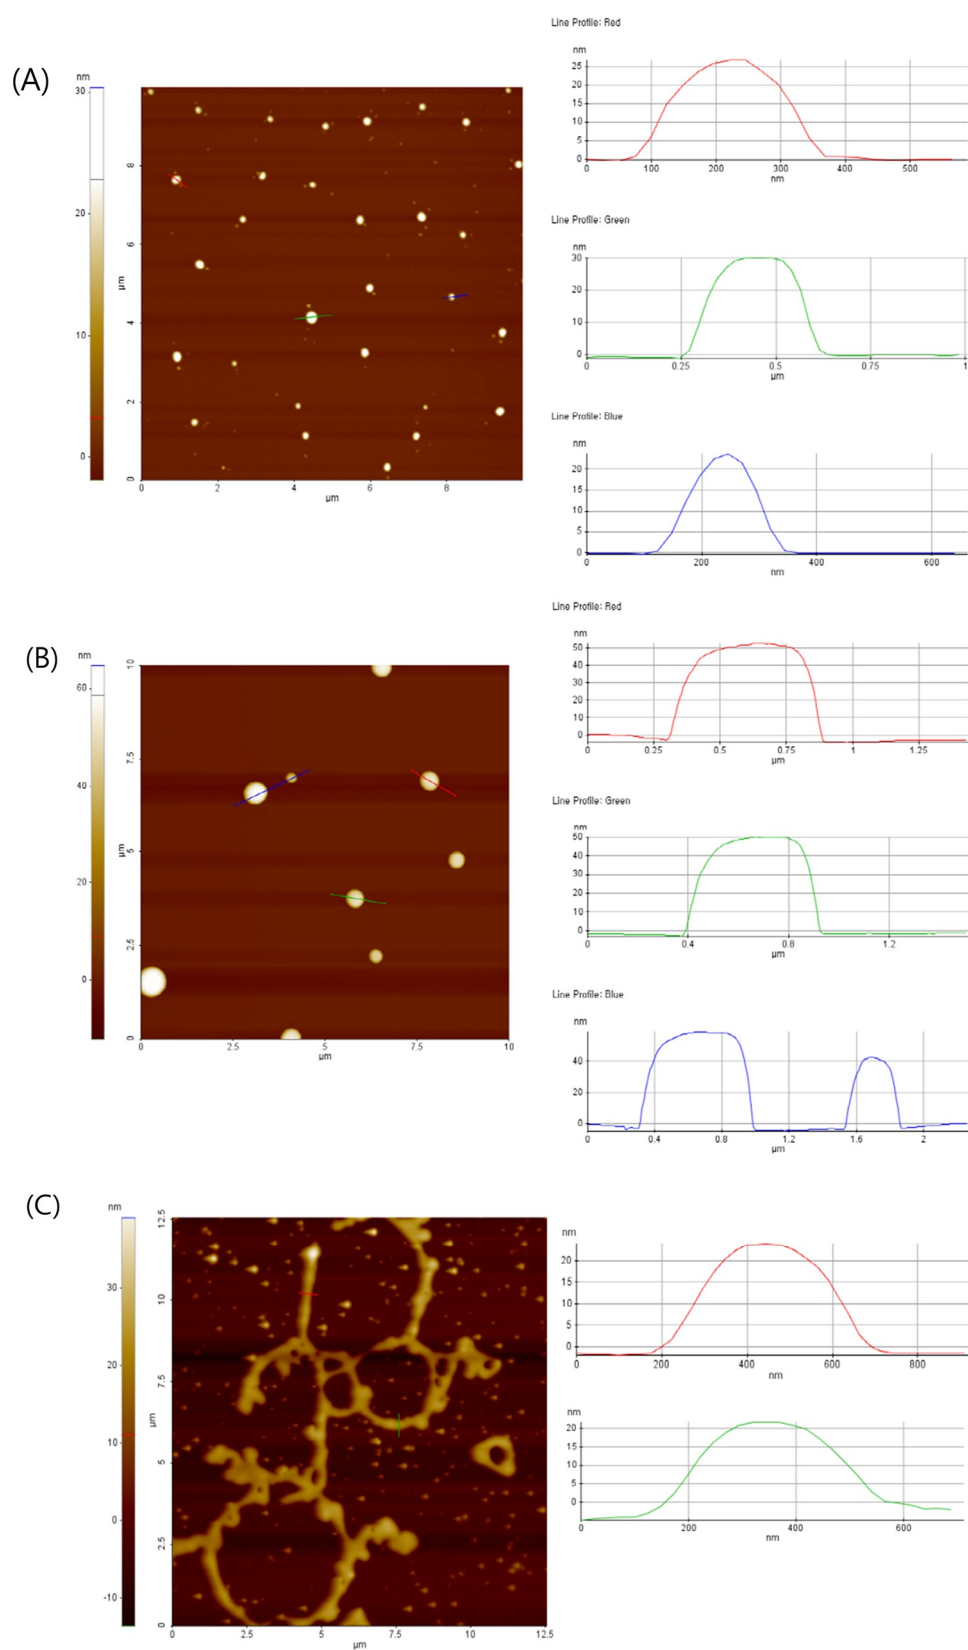

**Figure S9.** AFM images and height profile of (A) probe **1**, (B) probe **2** and (C) probe **1** + ClO<sup>-</sup>.

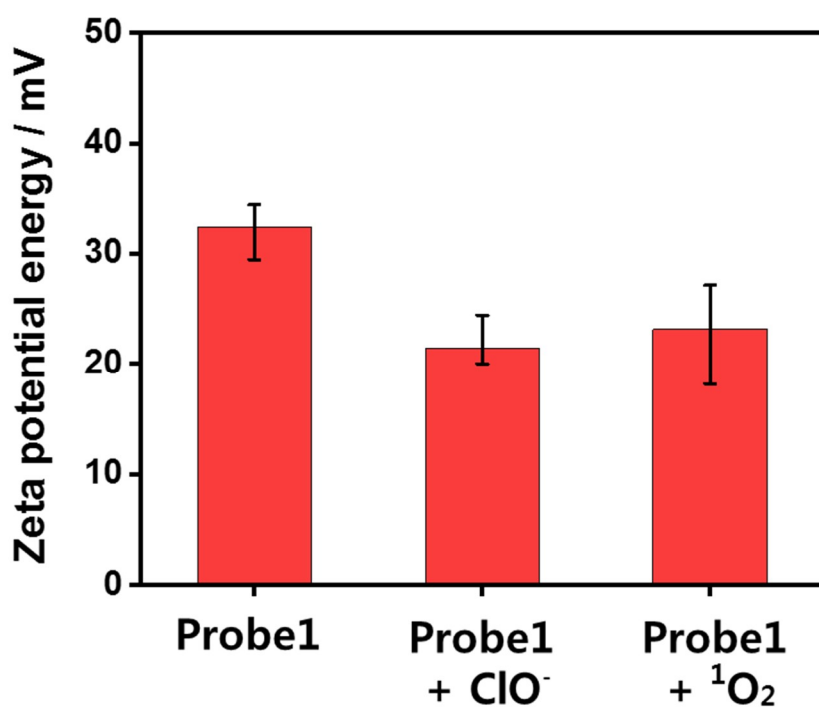

**Figure S10.** Zeta potential of probe **1** ( none, addition of ClO<sup>-</sup>, <sup>1</sup>O<sub>2</sub>) at 25 °C.

**Table S1.** Characterization of probes **1** and **2**.

|                                | Probe 1                                                                                    | Probe 2                                                                        |
|--------------------------------|--------------------------------------------------------------------------------------------|--------------------------------------------------------------------------------|
| Chemical Formula               | C <sub>66</sub> H <sub>56</sub> N <sub>2</sub> O <sub>2</sub> P <sub>2</sub> <sup>2+</sup> | C <sub>49</sub> H <sub>45</sub> BrN <sub>2</sub> O <sub>2</sub> P <sup>+</sup> |
| Molecular Weight               | 971.13 g/mol                                                                               | 804.79 g/mol                                                                   |
| λ <sub>max</sub> (monomer)     | 366nm                                                                                      | 367nm                                                                          |
| λ <sub>max</sub> (aggregation) | 371nm                                                                                      | 372nm                                                                          |
| Aggregation type               | J-aggregation                                                                              | J-aggregation                                                                  |
| λ <sub>max</sub> (Fluorecence) | 512nm                                                                                      | 512nm                                                                          |

## References

- S1. Artinez-Abadia, M.; Varghese, S.; Gimenez, R.; Ros, M. B. Multiresponsive luminescent dicyanodistyrylbenzenes and their photochemistry in solution and in bulk. *J. Mater. Chem. C* **2016**, *4*, 2886-2893.
- S2. Niu, J.; Fan, J.; Wang, X.; Xiao, Y.; Xie, X.; Jiao, X.; Sun, C.; Tang, B. Simultaneous fluorescence and chemiluminescence turned on by aggregation-induced emission for real-time monitoring of endogenous superoxide anion in live cells. *Anal. Chem. (Washington, DC, U. S.)* **2017**, *89*, 7210-7215; Long, G. L.; Winefordner, J. D. Limit of detection. A closer look at the IUPAC definition. *Anal. Chem.* **1983**, *55*, 712A-724A.; Mun, G.; Jung, S. H.; Ahn, A.; Lee, S. S.; Choi, M. Y.; Kim, D. H.; Kim, J.-Y.; Jung, J. H. Fluorescence imaging for Fe<sup>3+</sup> in Arabidopsis by using simple naphthalene-based ligands. *RSC Adv.* **2016**, *6*, 53912-53918.
